# Supplementary material for: Simultaneous enzymatic activity modulation and rapid determination of enzyme kinetics by highly crystalline graphite dots
Source: Royal Society of Chemistry journal article supplement (doi:10.1039/c7nr02285a), 2017-01-01
Supplement: c7nr02285a1.pdf [file c7nr02285a1.pdf]

Electronic Supplementary Information (ESI)

## **Simultaneous enzymatic activity modulation and rapid determination of enzyme kinetics by highly crystalline graphite dots**

Rui Shi<sup>a,§</sup>, Hao Li<sup>a,§</sup>, Enhui Wu<sup>a</sup>, Lipeng Xiong<sup>b</sup>, Rui Lv<sup>a</sup>, Ruochen Guo<sup>a</sup>, Yang Liu<sup>a</sup>, Guoqiang Xu<sup>b</sup>, Zhenhui Kang<sup>a\*</sup>, Jian Liu<sup>a\*</sup>

<sup>a</sup> Jiangsu Key Laboratory for Carbon-based Functional Materials and Devices, Institute of Functional Nano and Soft Materials (FUNSOM), Soochow University, Suzhou, Jiangsu 215123, China. E-mail: zhkang@suda.edu.cn, jliu@suda.edu.cn.

<sup>b</sup> College of Pharmaceutical Sciences, Soochow University, Suzhou, Jiangsu, 215123 China.

<sup>§</sup> These authors contributed equally.

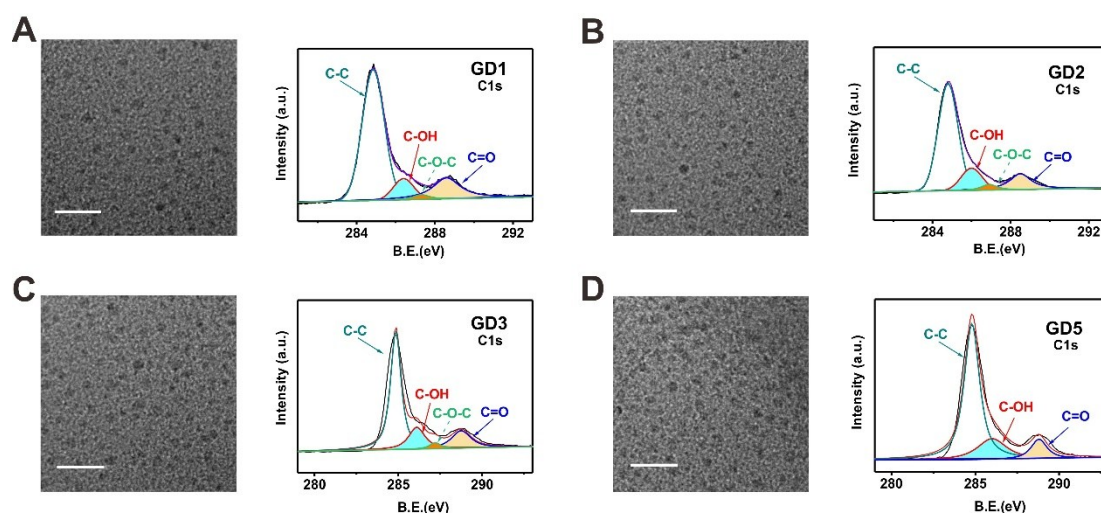

**Figure S1** TEM images and high-resolution XPS spectra of GD series, (A) GD1; (B) GD2; (C) GD3; (D) GD5. Scale bar: 20nm. Deconvolution of C1s of the XPS spectra were performed to analyze the possible components (C-C, C=O, C-O, and C-O-C if available) on the GD surface. The content of C-O-C in GD5 was too low to be deconvolved.

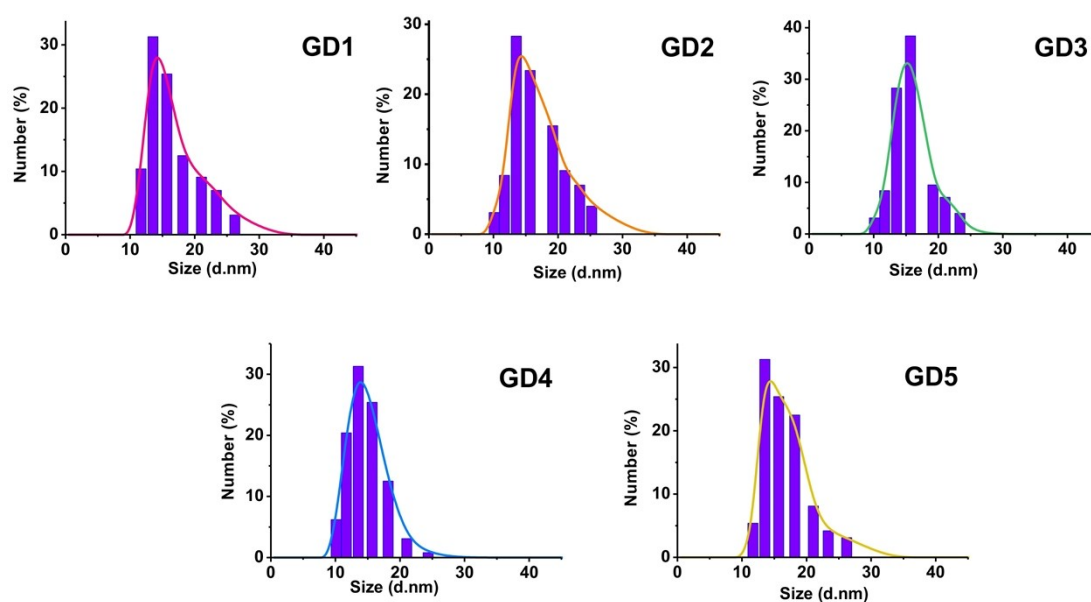

**Fig. S2** Size distributions of GD1-GD5. The measure results were obtained by a dynamic light scattering (DLS) instrument (Zetasizer Nano ZS, ZEN 3690, Malvern).

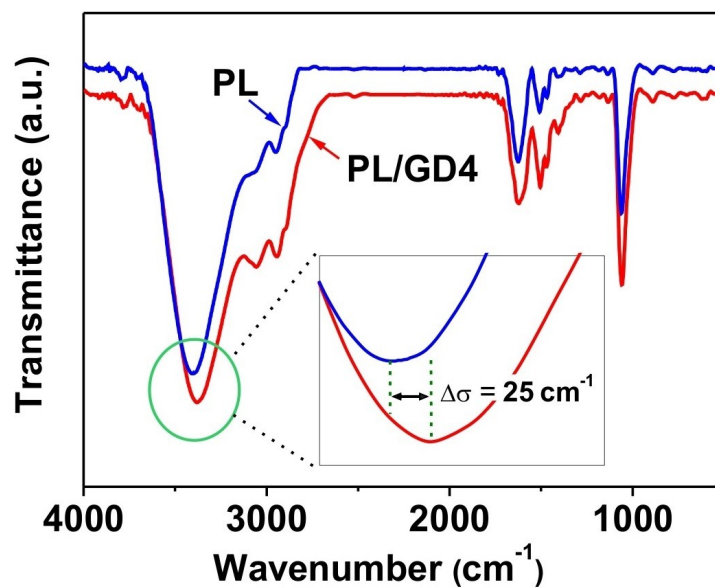

**Fig. S3** Comparison of FT-IR spectra of the PL and PL/GD4 complexes. Inset: a zoomed-in view of the red shift of the peak highlighted by the green oval.

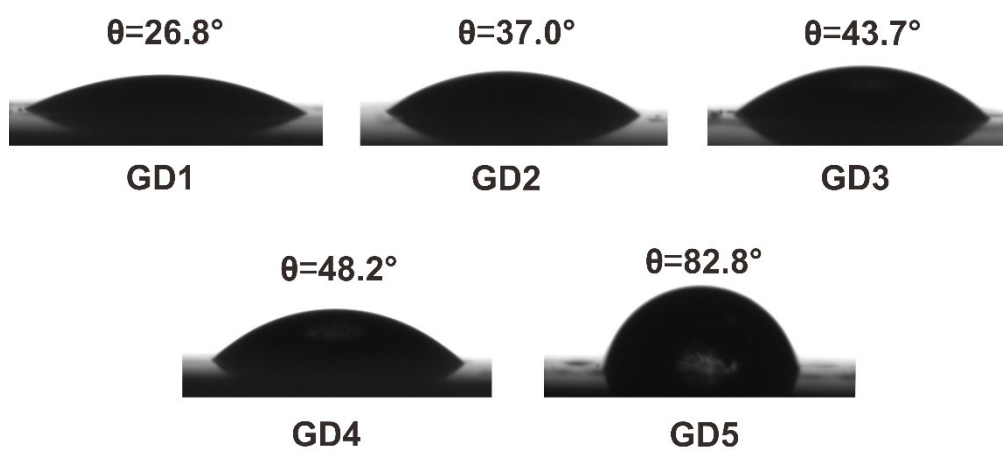

**Fig. S4** The contact angle measurements of the GD1-GD5. The images were recorded by contact angle measurement instrument (DataPhysics OCA).
